# Supplementary material for: In vitro–in vivo Validation of Stimulatory Effect of Oat Ingredients on Lactobacilli
Source: MDPI journal article supplement (doi:10.3390/pathogens10020235), 2021-02-19
Supplement: s1 [file s1]

## Supplementary Materials:

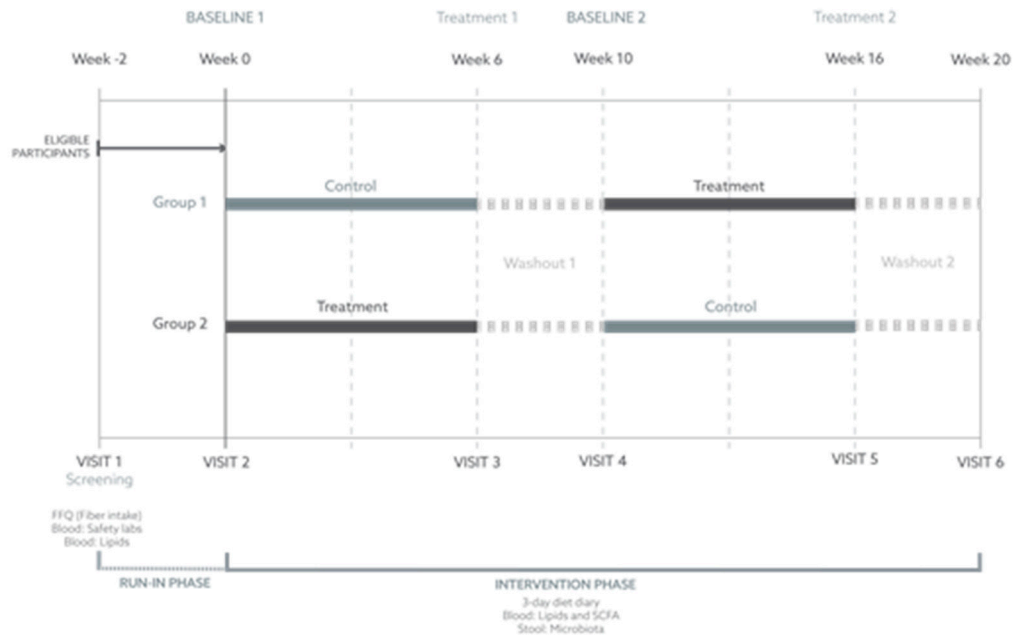

**Figure S1.** Cross-over study design.
